# Supplementary material
Source: PubMed Central journal article supplement (PMC3114948)

# **Supporting Information**

## **for**

### **High-throughput neuraminidase substrate specificity study of human and avian influenza A viruses**

**Yanhong Li,<sup>1</sup> Hongzhi Cao,<sup>1,2</sup> Nguyet Dao,<sup>3</sup> Zheng Luo,<sup>4</sup>  
Hai Yu,<sup>1</sup> Yi Chen<sup>1</sup>, Nicole Baumgarth,<sup>4</sup> Carol Cardona,<sup>5</sup> Xi Chen<sup>1,\*</sup>**

<sup>1</sup>Department of Chemistry, University of California-Davis, CA 95616

<sup>2</sup>Current address: National Glycoengineering Research Center, Shandong University, Jinan, Shandong 250012, P. R. China

<sup>3</sup>Department of Population Health and Reproduction, School of Veterinary Medicine, University of California-Davis 95616

<sup>4</sup>Center for Comparative Medicine & Dept. Pathology, Microbiology & Immunology, University of California-Davis, CA 95616

<sup>5</sup>Veterinary and Biomedical Sciences, College of Veterinary Medicine, University of Minnesota, St Paul, MN 55108

\*Corresponding author: Xi Chen, Tel: 530-754-6037; Fax: 530-752-8995; E-mail: chen@chem.ucdavis.edu

**Table S1.** The ratio of the natural sialic acid released from the substrates Sia $\alpha$ 2–6Gal $\beta$ pNP and Sia $\alpha$ 2–3Gal $\beta$ pNP. <sup>a</sup>Ratios higher than 0.41 are shown in bold.

| <b>Viral strain</b>       | <b>Type</b> | <b>Ratio (1b/1a)<sup>a</sup></b> |
|---------------------------|-------------|----------------------------------|
| sh/HKWF569/07             | H3N1        | 0.26                             |
| sh/HKWF216/07             | H6N1        | 0.09                             |
| mal/8212/08               | H6N1        | 0.11                             |
| mal/8322/08               | H6N1        | 0.09                             |
| tel8326/08                | H1N1        | 0.41                             |
| sh/HKWF268/07             | H6N2        | 0.25                             |
| tel/7972/08               | H6N2        | 0.23                             |
| mal/8035/08               | H5N2        | 0.22                             |
| wi/HKWF295/07             | H6N5        | 0.10                             |
| wi/HKWF541/07             | H6N5        | 0.20                             |
| wi/8352/08                | H12N5       | 0.14                             |
| dk/7896/08                | H4N6        | 0.22                             |
| emu/2092/96               | H10N7       | 0.22                             |
| sh/JN950/06               | H10N7       | 0.25                             |
| gos/HKWF446/07            | H10N7       | <b>0.57<sup>c</sup></b>          |
| sh/HKWF848/07             | H3N7        | 0.41                             |
| sh/HKWF1021/07            | H3N7        | 0.32                             |
| sh/HKWF1128/07            | H2N7        | 0.23                             |
| tel/HKWF1111/07           | H5N7        | 0.18                             |
| mal/6957/08               | H10N7       | 0.35                             |
| dk/K90/05                 | H6N8        | 0.06                             |
| tel/8204/08               | H5N9        | 0.29                             |
| dk/448/78                 | H9N2        | 0.35                             |
| dk/702/79                 | H9N2        | <b>0.43</b>                      |
| Q/A28945/88               | H9N2        | 0.39                             |
| Q/29209-1/93              | H9N2        | <b>0.49</b>                      |
| dk/Y280/97                | H9N2        | 0.27                             |
| ck/G9/97                  | H9N2        | <b>0.48</b>                      |
| pt/2373/98                | H9N2        | 0.22                             |
| ck/SF3/99                 | H9N2        | 0.36                             |
| QA23                      | H9N2        | 0.16                             |
| Qa23CkA10                 | H9N2        | 0.15                             |
| <i>HK/2108/03</i>         | <i>H9N2</i> | <b>0.46</b>                      |
| <i>A/PR8</i>              | <i>H1N1</i> | <b>0.53</b>                      |
| <i>A/Mem71</i>            | <i>H3N1</i> | <b>0.42</b>                      |
| <i>A/Udorn72</i>          | <i>H3N2</i> | <b>0.64</b>                      |
| <i>A/Philips</i>          | <i>H3N2</i> | <b>0.53</b>                      |
| <i>A/PR8 (purified)</i>   | <i>H1N1</i> | <b>0.61</b>                      |
| <i>A/Mem71 (purified)</i> | <i>H3N1</i> | <b>0.49</b>                      |

**Table S2.** Relative activities for  $\alpha$ 2–3-linked sialosides<sup>a</sup>.

| Viral Strain                  | Type        | Substrate Specificity <sup>b</sup> |    |      |      |    |     |
|-------------------------------|-------------|------------------------------------|----|------|------|----|-----|
|                               |             | 2a                                 | 3a | 4a   | 5a   | 6a | 10a |
| <b>Group 1 NA</b>             |             |                                    |    |      |      |    |     |
| sh/HKWF569/07                 | H3N1        | ++++                               | +  | ++++ | ++++ | -  | -   |
| sh/HKWF216/07                 | H6N1        | ++++                               | -  | +++  | ++++ | -  | -   |
| mal/8212/08                   | H6N1        | ++++                               | -  | +++  | ++++ | -  | -   |
| mal/8322/08                   | H6N1        | ++++                               | -  | ++   | +++  | -  | -   |
| tel8326/08                    | H1N1        | ++++                               | -  | +    | ++++ | -  | -   |
| <i>A/PR8<sup>c</sup></i>      | <i>H1N1</i> | ++++                               | -  | ++   | +++  | -  | -   |
| <i>A/Mem71<sup>c</sup></i>    | <i>H3N1</i> | ++++                               | -  | ++   | +++  | -  | -   |
| wi/HKWF295/07                 | H6N5        | ++++                               | -  | ++   | +++  | -  | -   |
| wi/HKWF541/07                 | H6N5        | ++++                               | -  | +++  | ++++ | -  | +   |
| wi/8352/08                    | H12N5       | ++++                               | -  | +++  | +++  | -  | -   |
| dk/K90/05                     | H6N8        | ++++                               | -  | +    | +++  | -  | -   |
| <b>Group 2 NA</b>             |             |                                    |    |      |      |    |     |
| sh/HKWF268/07                 | H6N2        | ++++                               | -  | +    | +++  | -  | -   |
| tel/7972/08                   | H6N2        | +++                                | -  | -    | +++  | -  | -   |
| dk/448/78                     | H9N2        | ++++                               | -  | +    | +++  | -  | -   |
| dk/702/79                     | H9N2        | ++++                               | -  | ++   | ++++ | -  | +   |
| Q/29209-1/93                  | H9N2        | ++++                               | -  | ++   | ++++ | -  | -   |
| pt/2373/98                    | H9N2        | ++++                               | -  | -    | +++  | -  | -   |
| ck/SF3/99                     | H9N2        | ++++                               | -  | -    | +++  | -  | -   |
| QA23                          | H9N2        | ++++                               | -  | -    | ++   | -  | -   |
| Qa23CkA10                     | H9N2        | ++++                               | -  | -    | ++   | -  | -   |
| <i>HK/2108/03<sup>c</sup></i> | <i>H9N2</i> | ++++                               | -  | -    | +++  | -  | -   |
| <i>A/Udorn72<sup>c</sup></i>  | <i>H3N2</i> | ++++                               | -  | -    | +++  | -  | -   |
| <i>A/Philips<sup>c</sup></i>  | <i>H3N2</i> | ++++                               | -  | -    | ++   | -  | -   |
| dk/7896/08                    | H4N6        | ++++                               | -  | +    | ++   | -  | -   |
| emu/2092/96                   | H10N7       | ++++                               | -  | -    | +++  | +  | +   |
| sh/JN950/06                   | H10N7       | ++++                               | -  | +    | +++  | +  | +   |
| gos/HKWF446/07                | H10N7       | ++++                               | +  | +++  | ++++ | ++ | +++ |
| sh/HKWF848/07                 | H3N7        | ++++                               | -  | +++  | ++++ | ++ | ++  |
| sh/HKWF1021/07                | H3N7        | ++++                               | -  | +++  | ++++ | +  | ++  |
| sh/HKWF1128/07                | H2N7        | ++++                               | -  | ++   | +++  | +  | +   |
| tel/HKWF1111/07               | H5N7        | ++++                               | -  | +    | ++   | -  | +   |
| mal/6957/08                   | H10N7       | ++++                               | -  | +    | ++++ | +  | +   |

<sup>a</sup>Absolute values for the percentage hydrolysis of Neu5Ac $\alpha$ 2-3Gal $\beta$ pNP (compound **1a**) and relative value for all other compounds. Relative value got: Virus neuraminidase activity using Neu5Ac $\alpha$ 2-3Gal $\beta$ pNP (compound **1a**) as the substrate is considered as 100%. "++++" represents

activity  $\geq$  60%; "+++" represents activity  $\geq$  40% but  $<$  60%; "++" represents activity  $\geq$  20% but  $<$  40%; "+" represents activity  $\geq$  10% but  $<$  20%; "-" represents activity  $<$  10%.

<sup>b</sup>The data for viruses with A405max below 0.2 when using Neu5Ac $\alpha$ 2-3Gal $\beta$ pNP (**1a**) as the substrate did not listed, including viruses mal/8035/08 (H5N2), tel/8204/08 (H5N9), Q/A28945/88 (H9N2), dk/Y280/97 (H9N2), and ck/G9/97 (H9N2). The data for the relative activity below 10% were not shown.

<sup>c</sup>Human influenza A viruses are shown in italics and NA activities of unpurified human influenza A viruses data were used in this table.

**Fig. S1. Substrate specificities of neuraminidases on avian and H9N2 influenza viruses.**

A, N1 type (group 1 neuraminidase); B, N2 type (group 2 neuraminidase); C, N5 type (group 1 neuraminidase); D, N7 type (group 2 neuraminidase); E, N6 (group 2 neuraminidase), N8 (group 1 neuraminidase), and N9 (group 1 neuraminidase) types; and F, H9N2 type. Allantoic fluids containing viruses at a titer of  $12.8 \text{ HAU mL}^{-1}$  were used directly for the assay. Results using  $\text{Sia}\alpha 2\text{-3Gal}\beta\text{pNP}$  (**1a-10a**) and  $\text{Sia}\alpha 2\text{-6Gal}\beta\text{pNP}$  (**1b-10b**) as substrates were shown in white and black bars respectively. Different numbers (**1-10**) represent sialosides containing different sialic acid structures as shown in Table 2. The sialic acid cleavage activity of viral neuraminidase using  $\text{Neu5Ac}\alpha 2\text{-3Gal}\beta\text{pNP}$  as the substrate was plotted as 100% with an assay read out represented by the  $A_{405\text{max}}$  shown for each virus.

**A. N1 Type (group 1 neuraminidase)**

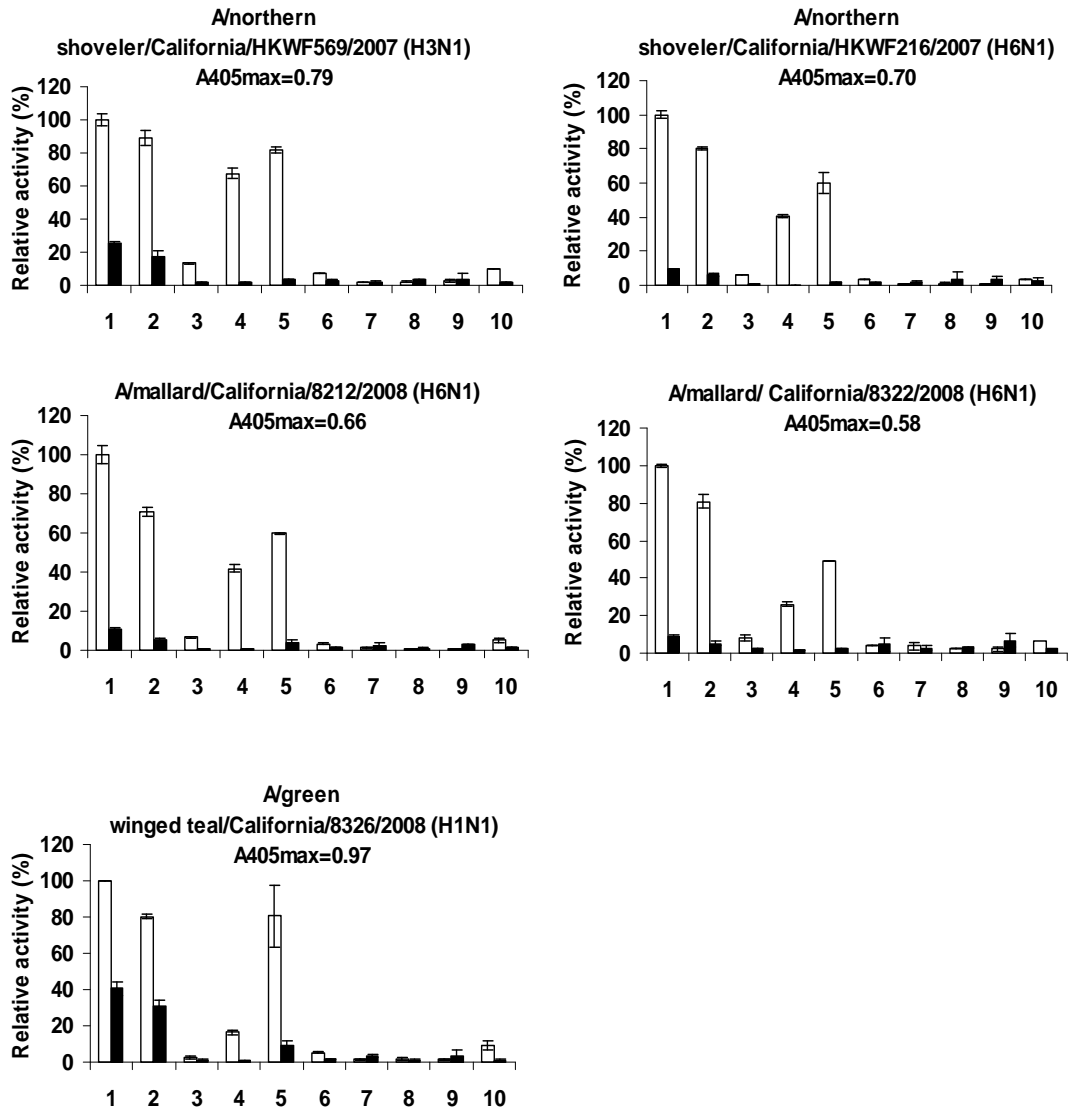

**B. N2 Type (group 2 neuraminidase)**

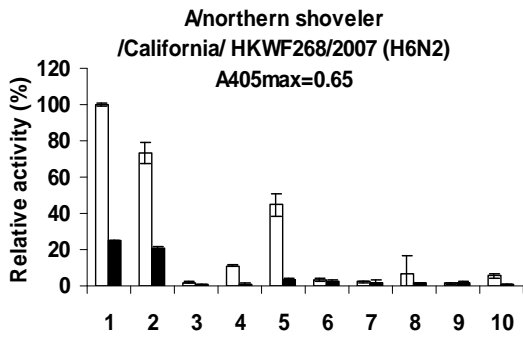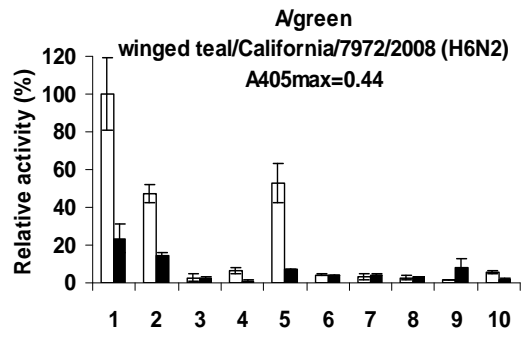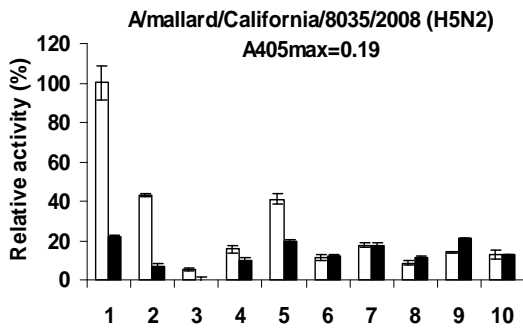

**C. N5 Type (group 1 neuraminidase)**

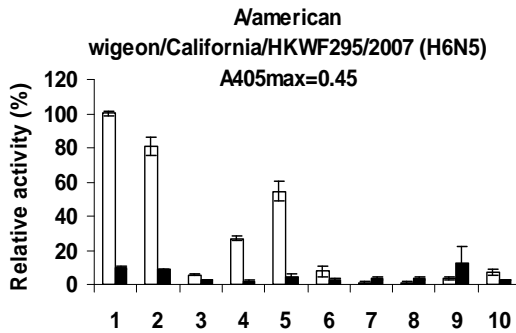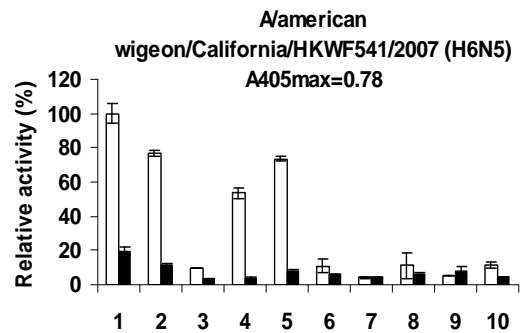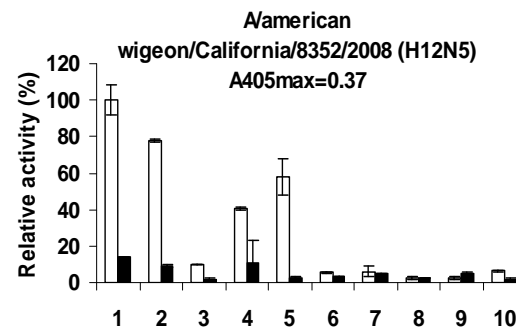

#### D. N7 Type (group 2 neuraminidase)

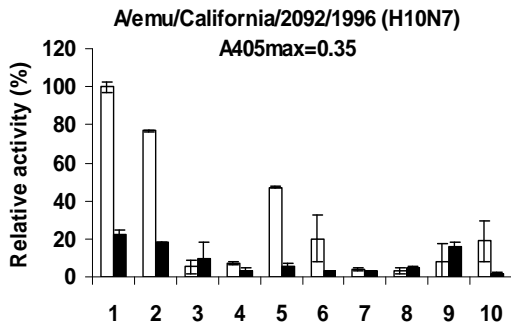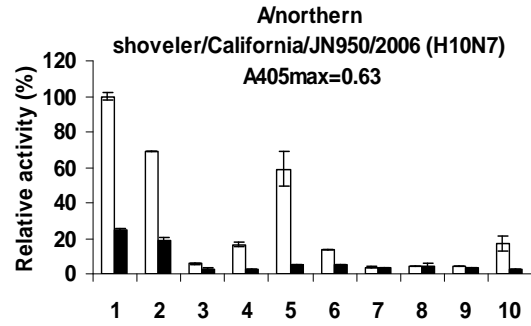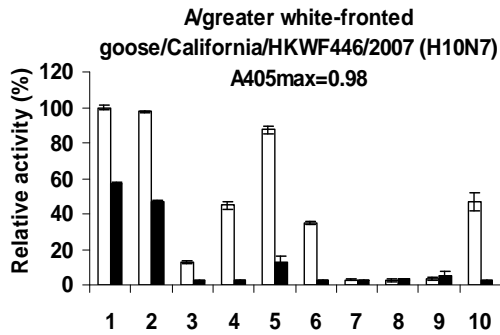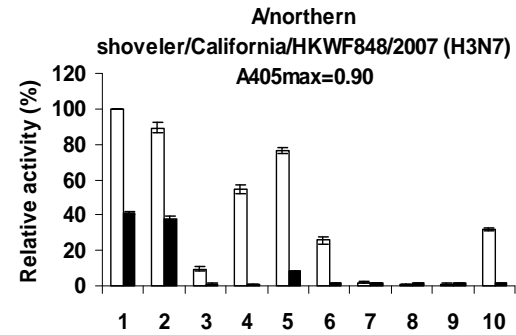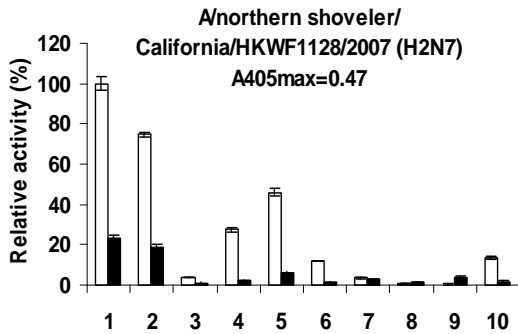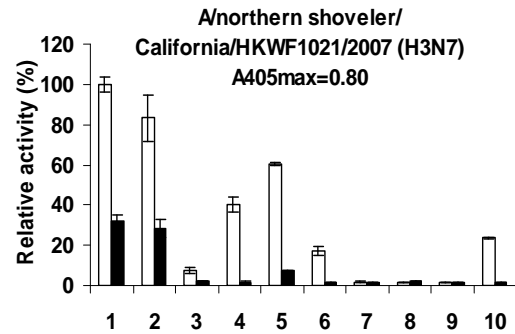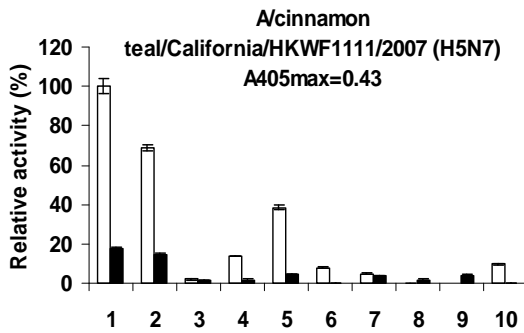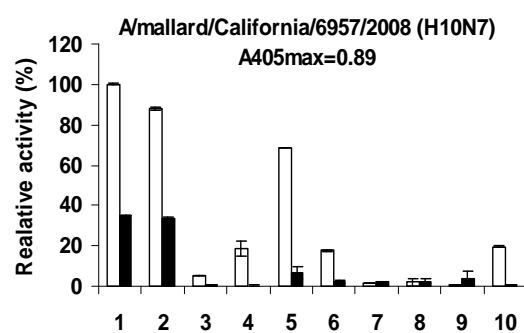

**E. N6 (group 2 neuraminidase), N8 (group 1 neuraminidase), and N9 (group 1 neuraminidase) Types**

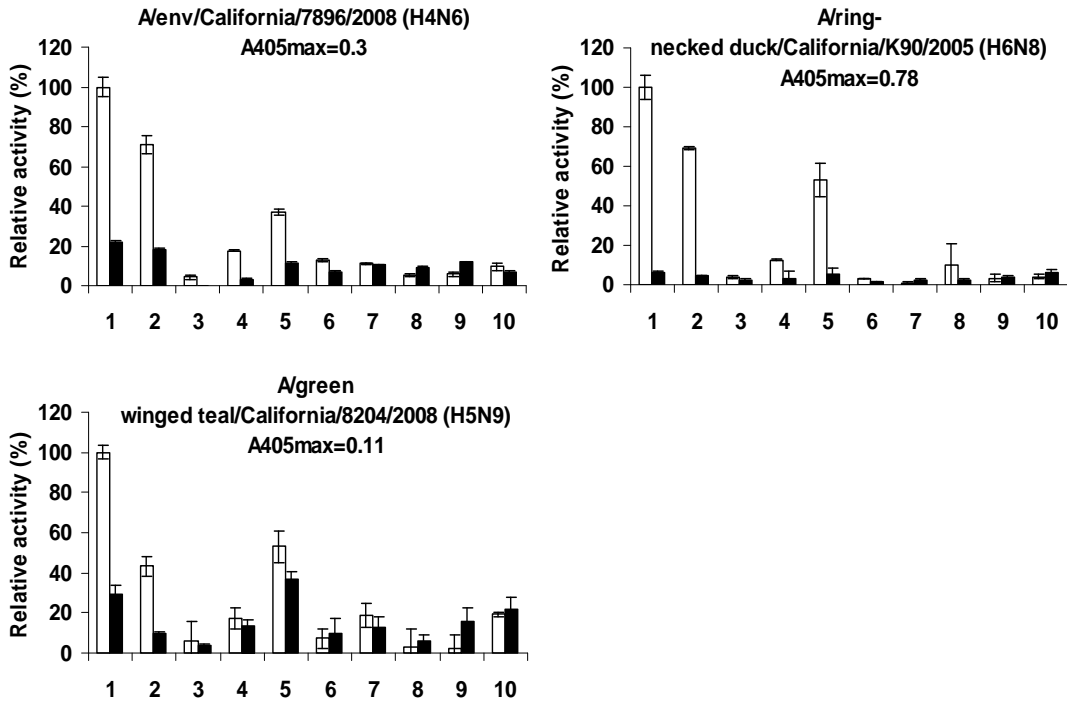

**F. H9N2 influenza A viruses**

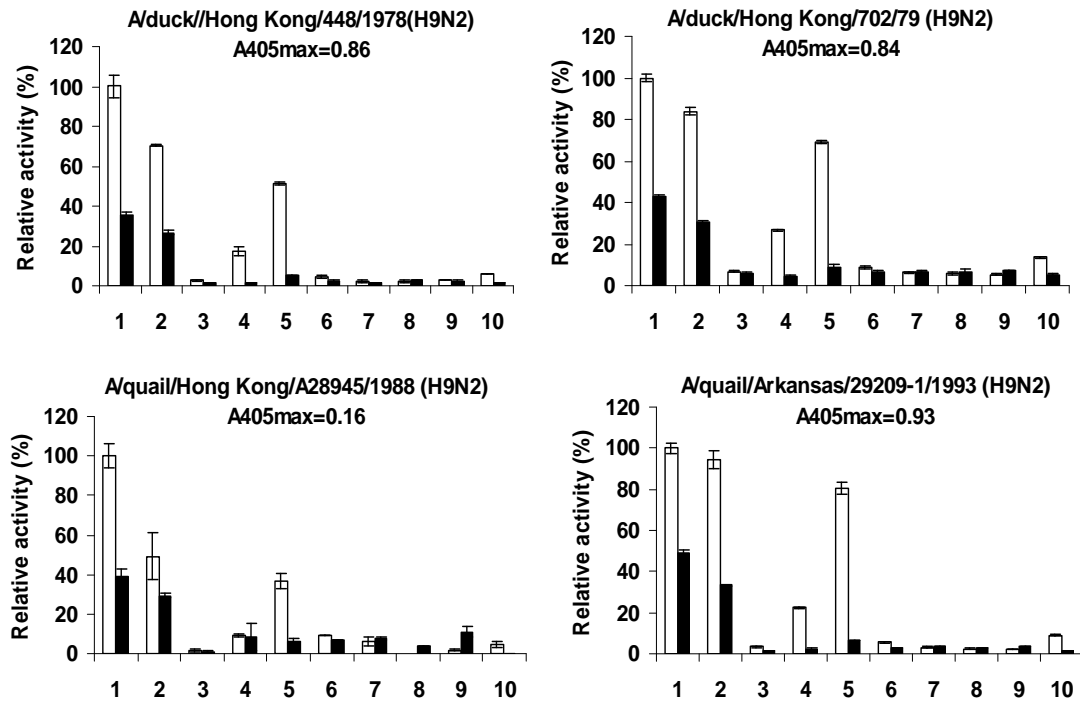



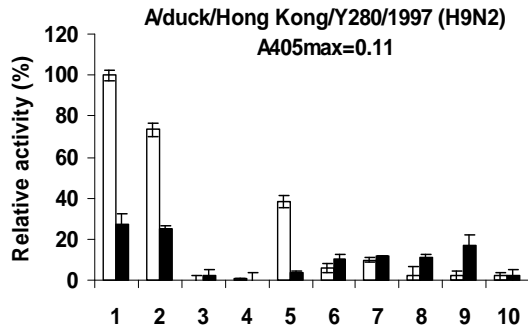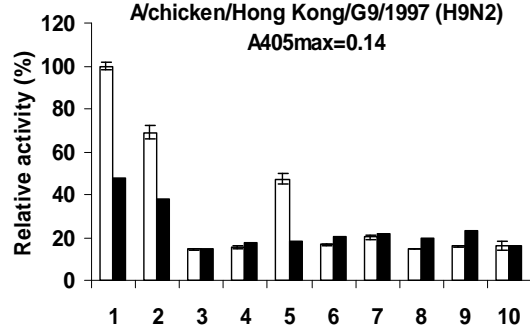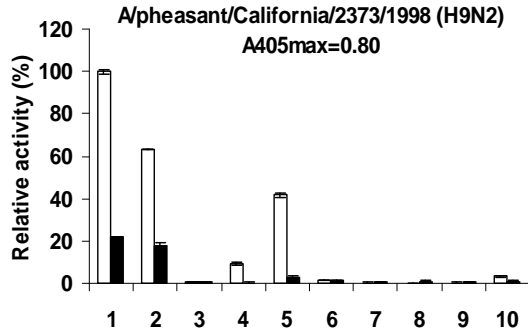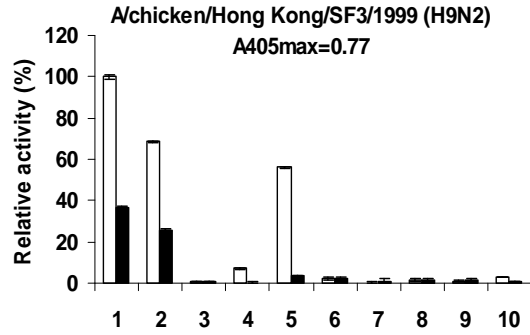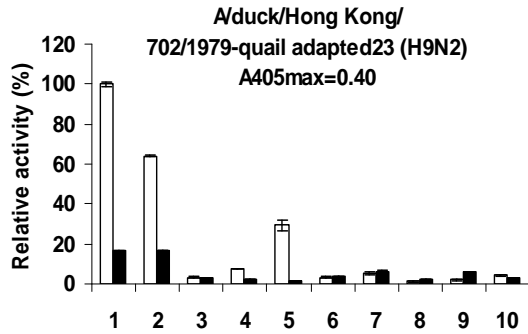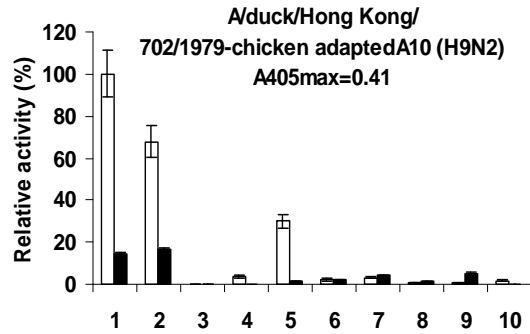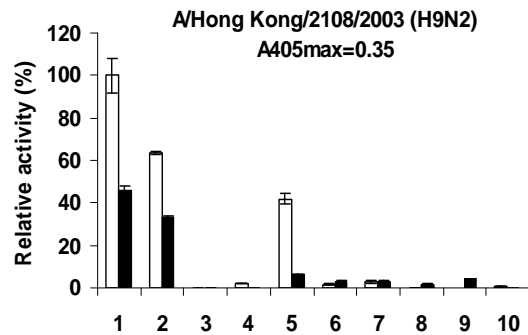

**Fig. S2. Substrate specificities of neuraminidases from purified and unpurified human influenza A viruses.** The titers of purified viruses were: A/PR8,  $1 \times 10^4$  HAU mL<sup>-1</sup>; A/Mem71,  $2 \times 10^3$  HAU mL<sup>-1</sup>. The titers of allantoic fluids containing viruses were: A/PR8,  $1 \times 10^3$  HAU mL<sup>-1</sup>; A/Mem71,  $5 \times 10^2$  HAU mL<sup>-1</sup>; A/Udon,  $5 \times 10^3$  HAU mL<sup>-1</sup>; A/Philippines:  $1 \times 10^4$  HAU mL<sup>-1</sup>. Results using Sia $\alpha$ 2–3Gal $\beta$ pNP (**1a–10a**) and Sia $\alpha$ 2–6Gal $\beta$ pNP (**1b–10b**) as substrates were shown in white and black bars respectively. Different numbers (**1–10**) represent sialosides containing different sialic acid structures as shown in Table 2. The sialic acid cleavage activity of viral neuraminidase using Neu5Ac $\alpha$ 2–3Gal $\beta$ pNP as the substrate was plotted as 100% with an assay read out represented by the A405max shown for each virus.

**A. Purified human virus**

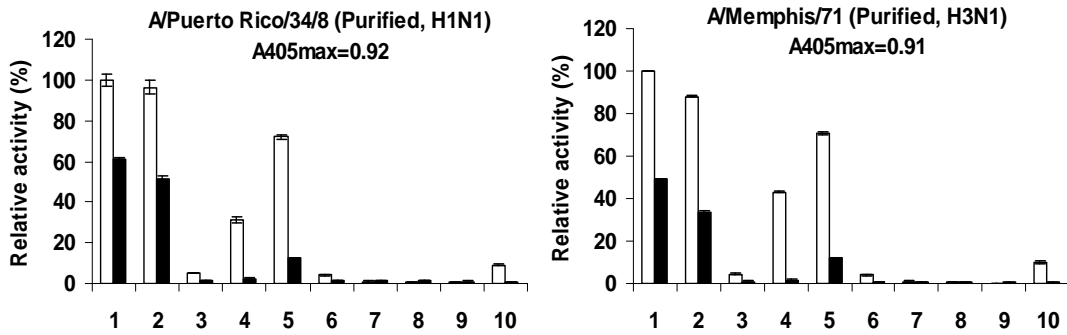

**B. unpurified human virus**

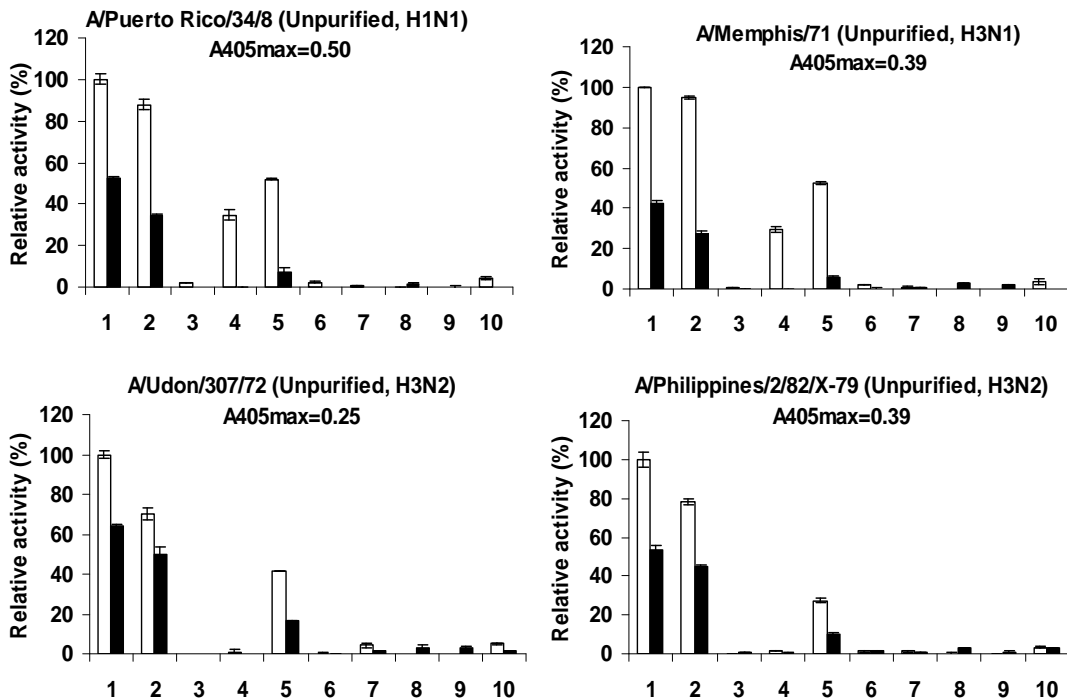

Supplement: NIHMS285374-supplement-01.pdf [file NIHMS285374-supplement-01.pdf]
